# Supplementary material for: A novel NIR fluorescent probe for the highly sensitive detection of HNO and its application in bioimaging
Source: Royal Society of Chemistry journal article supplement (doi:10.1039/d1nj04015d), 2021-01-01
Supplement: d1nj04015d1.pdf [file d1nj04015d1.pdf]

Supplementary Information

## A novel NIR fluorescent probe for highly sensitive detection of HNO and its application in bioimaging

Shenwei He<sup>a</sup>, Jianming Zhu<sup>a</sup>, Peiyao Xie<sup>a</sup>, Jianfei Liu<sup>a</sup>, Di Zhang<sup>b,\*</sup>, Jun Tang<sup>a</sup>, Yong Ye<sup>a,\*</sup>

<sup>a</sup> Green Catalysis Center, And College of Chemistry, Zhengzhou University, Zhengzhou, 450001, China

<sup>b</sup> Institute of Agricultural Quality Standards and Testing Technology, Henan Academy of Agricultural Sciences, Zhengzhou 450002, China.

### Experimental

#### Apparatus and chemicals

Absorption spectra were accurately measured on a Lambda 35 UV/VIS spectrometer (Perkin Elmer). Fluorescence spectra were measured on the F-4500 FL Spectrophotometer and the EX Slit and EM Slit were both set at 10.0 nm. The pH was measured by a Model PHs-3C meter (Shanghai, China). <sup>1</sup>H NMR, <sup>13</sup>C NMR and <sup>31</sup>P NMR spectra were measured on a Bruker DTX-400 spectrometer using TMS as internal reference. HR-MS (high-resolution mass spectrometry) spectra were collected using the Q-ToF HR-MS spectrometer (Waters Micromass).

All the reagents were purchased from reagent companies without further purification and directly used in the experiment. The deionized water was purified by Milli-Q. The concentrations of all interference ions are as 10.00 mmol/L, including F<sup>-</sup>, Cl<sup>-</sup>, Br<sup>-</sup>, I<sup>-</sup>, CO<sub>3</sub><sup>2-</sup>, HCO<sub>3</sub><sup>-</sup>, HPO<sub>4</sub><sup>2-</sup>, PO<sub>4</sub><sup>3-</sup>, NO<sub>3</sub><sup>-</sup>, NO<sub>2</sub><sup>-</sup>, SO<sub>4</sub><sup>2-</sup>, AcO<sup>-</sup>, HSO<sub>3</sub><sup>-</sup>, Na<sup>+</sup>, K<sup>+</sup>, HS<sup>-</sup>, Hcy, GSH, Cys, <sup>1</sup>O<sub>2</sub>, ClO<sup>-</sup>, H<sub>2</sub>O<sub>2</sub>, NO, ONOO<sup>-</sup>. The preparation of interference anions is to weigh the corresponding sodium or potassium salt of the desired mass.

#### Synthesis

The synthetic procedure of probe **PITC-HNO** was shown in Scheme 1. Compound **1** and **2** were synthesized by reported methods<sup>1, 2</sup>.

*Synthesis of Compound PITC-OCH<sub>3</sub>* Compound **1** (241 mg, 1.0 mmol), ammonium acetate (154 mg, 2.0 mmol) and compound **2** (312 mg, 1.3 mol) were dissolved in 15 mL of glacial acetic acid. The mixture was refluxed and stirred at 118 °C for 24 h in nitrogen atmosphere. The reaction solution was cooled to room temperature, 2 mL of water was added to precipitate and the solution was filtered to obtain a crude product. After the crude product was dried in vacuum, dichloromethane was used as the eluent for column chromatography to obtain 347 mg of silver gray solid PITC-OCH<sub>3</sub> with 75% yield.

*Synthesis of Compound PITC-OH* At 0 °C, BBr<sub>3</sub> (0.48 mL, 5 mmol) was slowly added dropwise to a solution of PITC-OCH<sub>3</sub> (335 mg, 0.5 mmol) in anhydrous dichloromethane (10 mL). After a period of reaction, the solution was stirred at room temperature for 14 hours. Saturated NaHCO<sub>3</sub> solution (30 mL) was added to quench the reaction, then the aqueous layer was extracted with CH<sub>2</sub>Cl<sub>2</sub>, the organic layer was dried over anhydrous Na<sub>2</sub>SO<sub>4</sub> and concentrated in vacuo to obtain 210 mg of crude green product. The crude product was directly used to synthesize **PITC-HNO** without separation and purification.

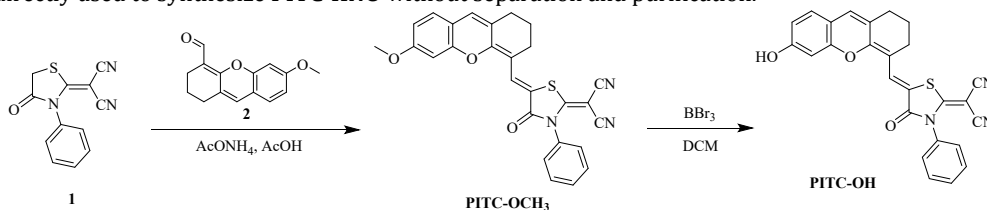

Scheme 1 Synthetic route of PITC-OH

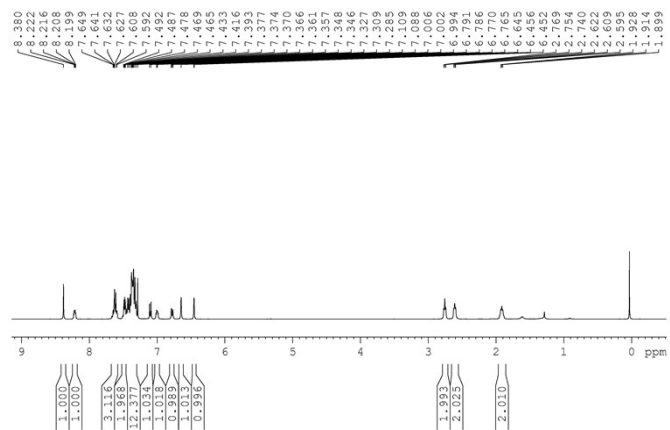

**Fig.S1**  $^1\text{H}$  NMR spectra of PITC-HNO in  $\text{CDCl}_3$ .

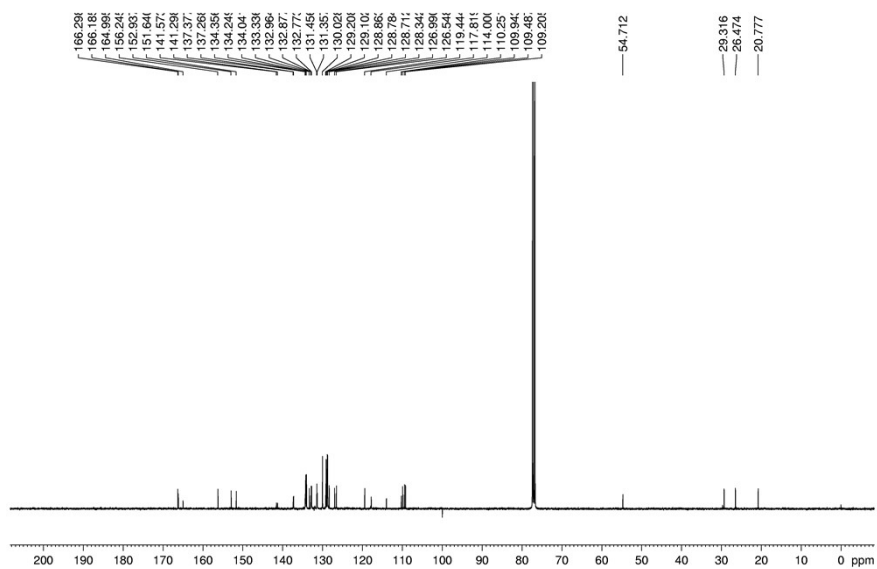

**Fig. S2**  $^{13}\text{C}$  NMR spectra of PITC-HNO in  $\text{CDCl}_3$

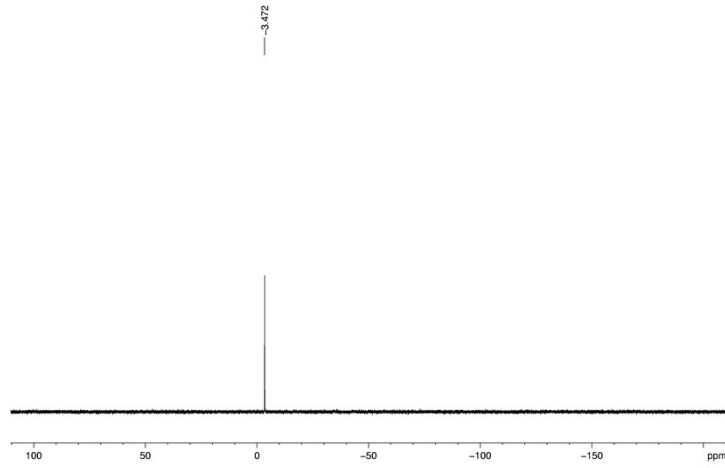

**Fig.S3**  $^{31}\text{P}$  NMR spectra of PITC-HNO in  $\text{CDCl}_3$ .

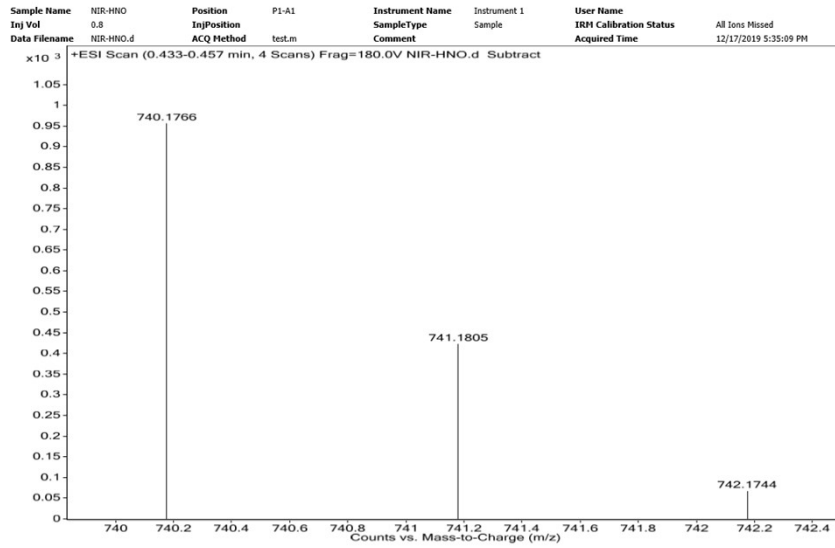

**Fig.S4** ESI-HRMS spectra of PITC-HNO.

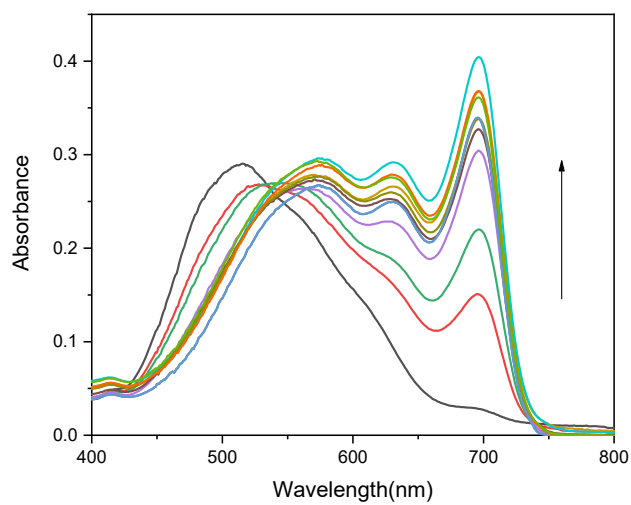

**Fig.S5** The change of UV spectra of the **PITC-HNO** (10 μM) solution after adding HNO (0–15 eq.) in PBS buffer solution (pH = 7.40, containing 40% DMF).

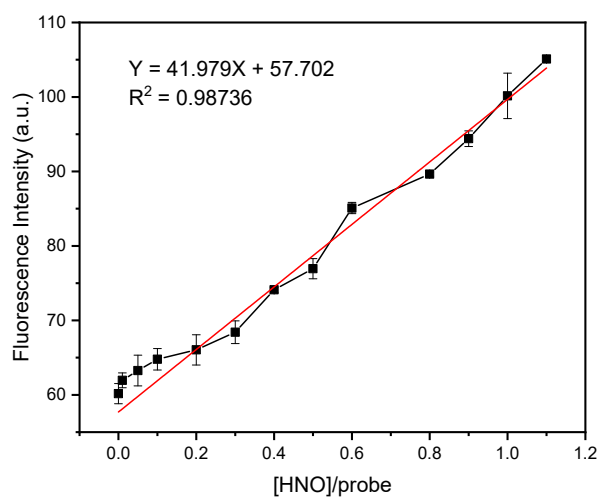

**Fig. S6** The linear fitting of fluorescence intensity against concentrations of HNO (0–1.1 eq.) at 714 nm.  $\lambda_{ex}$  = 640 nm.

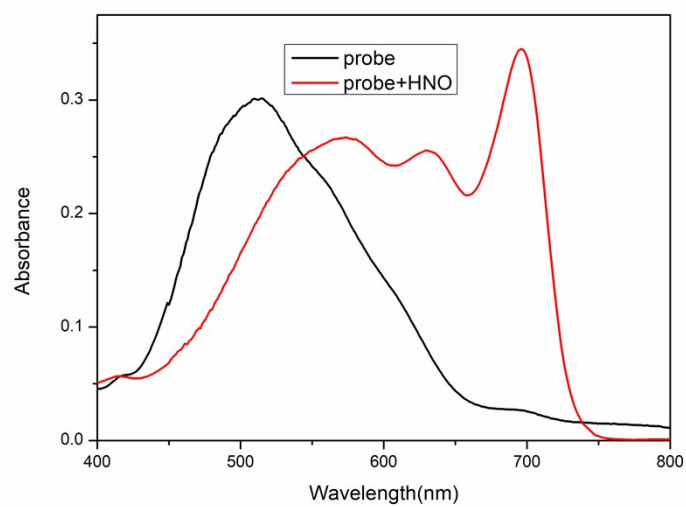

**Fig.S7** The change of absorption spectra of **PITC-HNO** before and after response to HNO.

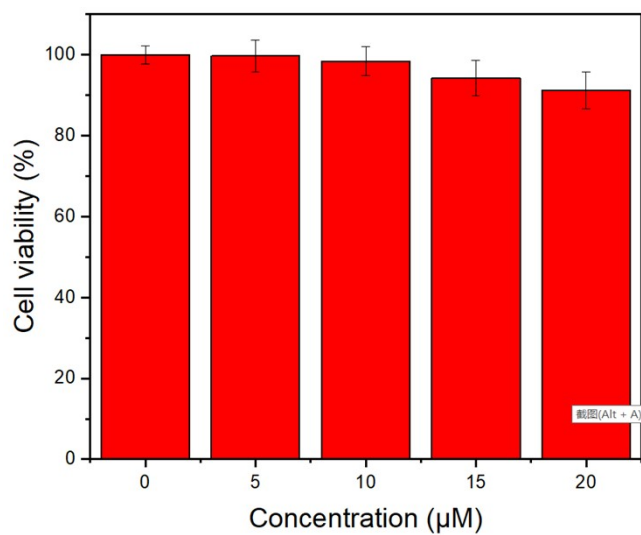

**Fig.S8** The cytotoxicity test of different concentrations **PITC-HNO** in living HeLa cells for 24 h.

## References

1. S. Gong, E. Zhou, J. Hong and G. Feng, *Anal Chem*, 2019, **91**, 13136-13142.
2. J. Mao, N. He, Z. Ning, Q. Zhang, F. Guo, L. Chen, W. Wu, J. Hua and H. Tian, *Angew Chem Int Ed Engl*, 2012, **51**, 9873-9876.
